# Supplementary material for: ICOS Is an Indicator of T-cell–Mediated Response to Cancer Immunotherapy
Source: Oxford University Press journal article supplement (doi:10.1158/0008-5472.can-19-3265), 2020-03-10
Supplement: 00085472can193265-sup-230898_2_supp_6092615_q687yb.pdf [file 00085472can193265-sup-230898_2_supp_6092615_q687yb.pdf]

Supplementary Figure 3

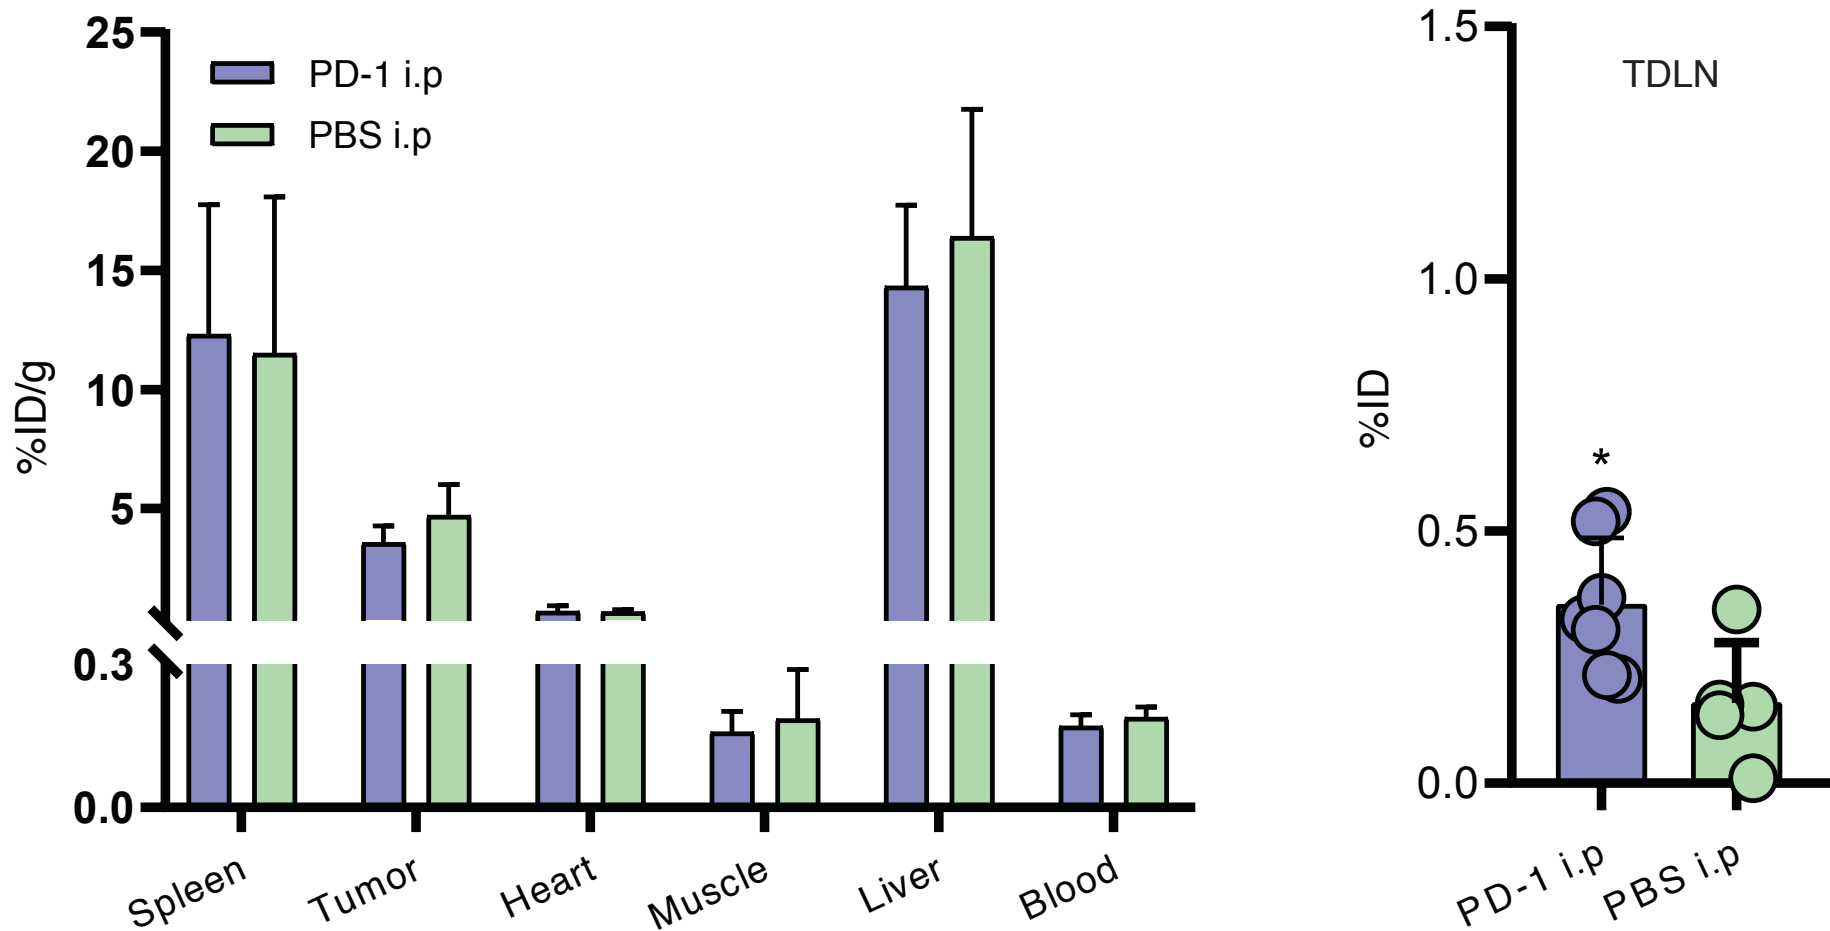

Figure S3: Ex-vivo biodistribution study of PD-1 i.p and PBS i.p groups (n≥5) on Day 8 post anti PD-1 treatment: the quantification of TDLN was expressed as %ID, other organs were expressed as %ID/g. All values represent the mean ± SD unless otherwise specified. Unpaired 2-tailed student's t-test were used for analysis. (\*: P<0.05, the data was presented as mean ± SD)
